# Supplementary material
Source: publisher site journal article supplement (https://www.e-cmh.org/upload/media/cmh-2023-0422-Supplementary-Fig-1.pdf)
Supplement: Supplementary file 1 [file cmh-2023-0422-Supplementary-Fig-1.pdf]

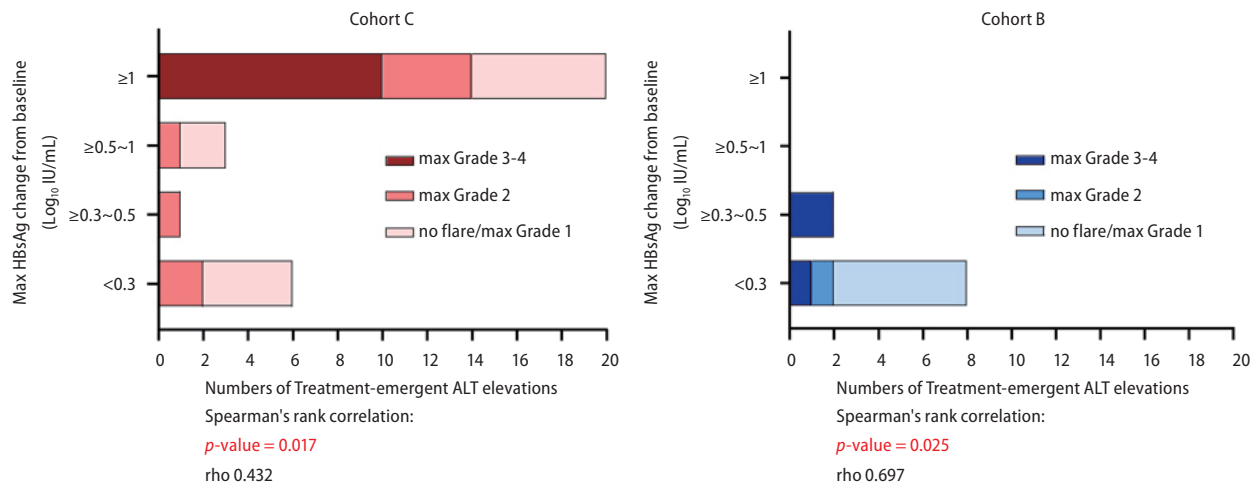

**Supplementary Figure 1.** Graded treatment-emergent ALT elevations\* and maximal categorical HBsAg declines in treatment-naïve patients. \*Treatment-emergent ALT elevation: ALT elevation with grade change from baseline: Grade 1 (1.25 to <2.5x ULN); Grade 2 (2.5 to <5x ULN); Grade 3 (5 to <10x ULN); Grade 4 (≥10x ULN). ALT, alanine aminotransferase; Max, maximal; NUC, nucleos(t)ide analogue; Peg-IFN, pegylated interferon; ULN, upper limit of normal (Male: 41 U/L; Female: 33 U/L).
